# Supplementary material for: Sustained-Release Fillers for Dentin Disinfection: An Ex Vivo Study
Source: Int J Dent. 2019 May 22;2019:2348146. doi: 10.1155/2019/2348146 (PMC6556298; doi:10.1155/2019/2348146)
Supplement: Supplementary Materials — Preparation of SRF-CPC. [file 2348146.f1.zip]

Archive with 3 entries (3 files):
- 2348146.f1/CFU agar plates.zip
- 2348146.f1/CFU data.xlsx
- 2348146.f1/Supporting information.docx
