# Supplementary material for: Sustained-Release Fillers for Dentin Disinfection: An Ex Vivo Study
Source: Int J Dent. 2019 May 22;2019:2348146. doi: 10.1155/2019/2348146 (PMC6556298; doi:10.1155/2019/2348146)
Supplement: Supplementary Materials — Preparation of SRF-CPC. [file 2348146.f1.zip › 2348146.f1/CFU data.xlsx]

## Sheet: Sheet1
	CFU counts
Treatment	#014	#018	#020		ISO Bur Size	#011	#013	#014	#018	#020
Control 1	9800	427	406		Diameter (mm)	1.1	1.3	1.4	1.8	2
Control 2	1900	145	42		Diameter (µm)	1100	1300	1400	1800	2000
Control 3	2200	204	29
CH 1	696	19	5
CH 2	435	376	284
CH 3	17	37	55
SRF-CPC 1	1	0	0
SRF-CPC 2	0	0	0
SRF-CPC 3	0	0	0
	CFU/mL
	SRF-CPC			CH			Control
#014	20	0	0	13920	8700	340	196000	38000	44000
#018	0	0	0	380	7520	740	8540	2900	4080
#020	0	0	0	100	5680	1100	8120	840	580
	Calculation of the volume of sampled dentin
	Volume occupied by previous bur	Volume occupied by sampling bur	Volume of sampled dentin
#014	5.31	6.16	0.85	0.85
#018	6.16	10.18	4.02	4.02
#020	10.18	12.57	2.39	2.39
	CFU/mm3
	SRF-CPC			CH			Control
#014	23.5294	0	0	16376.5	10235.3	400	230588	44705.9	51764.7
#018	0	0	0	94.5274	1870.65	184.08	2124.38	721.393	1014.93
#020	0	0	0	41.841	2376.57	460.251	3397.49	351.464	242.678
	CFU/mm3 (Log transformed)
#014	4.39232	0	0	13.765	13.087	8.41363	17.5805	15.2137	15.4252
#018	0	0	0	8.57365	12.8767	9.53333	13.0602	11.5023	11.9947
#020	0	0	0	6.65821	12.4719	10.1046	12.9874	9.71596	9.18239
Stastical analysis
ANOVA RESULTS
Table Analyzed	Transform of Relative to volume
Two-way ANOVA	Ordinary
Alpha	0.05
Source of Variation	% of total variation	P value	P value summary	Significant?
Interaction	3.077	0.2083	ns	No
Row Factor	10.72	0.0006	***	Yes
Column Factor	77.74	<0.0001	****	Yes
ANOVA table	SS	DF	MS	F (DFn, DFd)	P value
Interaction	26.01	4	6.503	F (4, 18) = 1.637	P=0.2083
Row Factor	90.66	2	45.33	F (2, 18) = 11.41	P=0.0006
Column Factor	657.2	2	328.6	F (2, 18) = 82.72	P<0.0001
Residual	71.5	18	3.972
Multiple comparisons
Within each row, compare columns (simple effects within rows)
Number of families	3
Number of comparisons per family	3
Alpha	0.05
Tukey's multiple comparisons test	Mean Diff.	95.00% CI of diff.	Significant?	Summary	Adjusted P Value
150
SRF-CPC vs. CH	-10.45	-14.60 to -6.298	Yes	****	<0.0001
SRF-CPC vs. Control	-14.77	-18.92 to -10.62	Yes	****	<0.0001
CH vs. Control	-4.318	-8.471 to -0.1651	Yes	*	0.0408
350
SRF-CPC vs. CH	-8.327	-12.48 to -4.174	Yes	***	0.0002
SRF-CPC vs. Control	-10.18	-14.33 to -6.026	Yes	****	<0.0001
CH vs. Control	-1.853	-6.006 to 2.300	No	ns	0.5036
450
SRF-CPC vs. CH	-8.495	-12.65 to -4.342	Yes	***	0.0002
SRF-CPC vs. Control	-9.374	-13.53 to -5.221	Yes	****	<0.0001
CH vs. Control	-0.8784	-5.032 to 3.275	No	ns	0.8529
Test details	Mean 1	Mean 2	Mean Diff.	SE of diff.	N1	N2	q	DF
150
SRF-CPC vs. CH	1.539	11.99	-10.45	1.627	3	3	9.082	18
SRF-CPC vs. Control	1.539	16.31	-14.77	1.627	3	3	12.84	18
CH vs. Control	11.99	16.31	-4.318	1.627	3	3	3.753	18
350
SRF-CPC vs. CH	0	8.327	-8.327	1.627	3	3	7.236	18
SRF-CPC vs. Control	0	10.18	-10.18	1.627	3	3	8.847	18
CH vs. Control	8.327	10.18	-1.853	1.627	3	3	1.61	18
450
SRF-CPC vs. CH	0	8.495	-8.495	1.627	3	3	7.383	18
SRF-CPC vs. Control	0	9.374	-9.374	1.627	3	3	8.146	18
CH vs. Control	8.495	9.374	-0.8784	1.627	3	3	0.7634	18
